33 **Abstract**

34 In Morocco two waves of SARS-CoV-2 infections have been recorded. The first one  
35 occurred from March 02, 2020 with infections mostly imported from Europe and the  
36 second one dominated by local infections.

37 At the time of writing, the genetic diversity of Moroccan isolates of SARS-CoV-2 has  
38 not yet been reported. The present study aimed to analyze first the genomic variation of  
39 the twenty-eight Moroccan strains of SARS-CoV-2 isolated from March 03, 2020 to  
40 May 15, 2020, to compare their distributions with twelve other viral genomes from  
41 North Africa as well as to identify their possible sources.

42 Our finding revealed 61 mutations in the Moroccan genomes of SARS-CoV-2 com-  
43 pared to the reference sequence Wuhan-Hu-1/2019, of them 23 (37.7%) were present in  
44 two or more genomes. Focusing on non-synonymous mutations, 29 (47.54%) were dis-  
45 tributed in five genes (ORF1ab, spike, membrane, nucleocapsid and ORF3a) with vari-  
46 able frequencies. The non-structural protein coding regions nsp3-Multi domain and  
47 nsp12-RdRp of the ORF1ab gene harbored more mutations, with six for each. The com-  
48 parison of genetic variants of forty North African strains revealed that two non-syn-  
49 onymous mutations D614G (in spike) and Q57H (in ORF3a) were common in four  
50 countries (Morocco, Tunisia, Algeria and Egypt), with a prevalence of 92.5% (n = 37)  
51 and 42.5% (n = 17), respectively, of the total genomes.

52 Phylogenetic analysis showed that the Moroccan and Tunisian SARS-CoV-2 strains  
53 were closely related to those from different origins (Asia, Europe, North and South  
54 America) and distributed in different distinct subclades. This could indicate different  
55 sources of infection with no specific strain dominating yet in in these countries. These  
56 results have the potential to lead to new comprehensive investigations combining ge-  
57 nomic data, epidemiological information and the clinical characteristics of patients with  
58 SARS-CoV-2.

59

60 **Keywords:** SARS-CoV-2, Morocco, North African strains, mutations, spike protein,  
61 RdRp, Phylogeny.

## 62 **Introduction**

63 The new coronavirus 2019, also known as Severe Acute Respiratory Syndrome  
64 Coronavirus 2 (SARS-CoV-2) (1) is the causative agent of COVID-19, a new type of  
65 pneumonia that caused in late December, 2020, an epidemic in Wuhan, China, and then  
66 spread to 215 countries around the world. In February, 2020, COVID-19 was emerged  
67 in North African countries, notably in Egypt, Tunisia, Algeria and Morocco (2, 3). The  
68 first case was reported in Egypt on February 14, followed by Algeria on February 25,  
69 then Morocco and Tunisia on the same day, March 2, 2020 (2, 3). Due to the rapid  
70 transmission of viruses in the 5 continents and the large number of confirmed cases, the  
71 World Health Organization (WHO) has declared (March 11, 2020) COVID-19 as a  
72 global pandemic (4). As of June 26<sup>th</sup> 9,473,214 and 484,249 (5.11%) of confirmed and  
73 deceased cases, respectively, have been reported worldwide (5). It should be noted that  
74 mortality from SARS-CoV-2 differs considerably according to the geographic region.  
75 USA has the largest population of confirmed cases (2,367,064) and deaths (121,645)  
76 (5). Meanwhile, South America and Europe were also hit hard with 1,188,631 and  
77 620,794 confirmed cases in Brazil and Russia, on their respective continents, while the  
78 African region had the least number of cases, with 258,752 (5).

79 SARS-CoV-2 is a single-stranded positive-sense RNA virus, coding for four structural  
80 proteins (spike (S), envelope (E), membrane (M) and nucleocapsid (N)), 16 non-  
81 structural proteins (nsp1 to nsp16) and several accessory proteins (ORF3a, ORF6,  
82 ORF7a, ORF7b, and ORF8) (6,7). Protein S which is responsible for binding to  
83 membrane receptors in host cells (ACE2) *via* its receptor-binding domain (RBD),  
84 therefore is considered as the most important target for candidate vaccines (8,9,10).

85 It is known that the mutation rate of the RNA virus contributes to viral adaptation,  
86 creating a balance between the integrity of genetic information and the variability of the  
87 genome, thus allowing viruses to escape host immunity and develop drug resistance  
88 (11,12). Our recent study (13) based on the analysis of 30,983 genomes of SARS-CoV-  
89 2 variants belonging to 80 countries, revealed 5.67% of total mutations with a  
90 frequency greater than 1% of all the sequences analyzed suggesting that this virus is not  
91 yet adapted to its host.

92 The genetic variants of the Moroccan strains of SARS-CoV-2 and their distribution

93 along the viral genome are not yet documented. In the present study, we investigated  
94 the genomic diversity of twenty-eight SARS-CoV-2 strains that emerged in Morocco  
95 between March 3<sup>th</sup> and May 15<sup>th</sup>, 2020 with s six new genomes presented for the first  
96 time. Next, we compared the distribution of these SARS-CoV-2 variants with twelve  
97 other genomes from North Africa (Tunisia, Algeria and Egypt). In addition, the  
98 identification of the possible source of the Moroccan strains was carried out by  
99 comparing them with genomes from Africa, Asia, Europe, North and South America  
100 and Oceania.

## 101 **Materials and Methods**

### 102 **Genomes sequencing**

103 From the viral RNA extracted from six clinical samples, the cDNA was synthesized  
104 using reverse transcriptase with random hexamers, then amplified for genomes  
105 enrichment using Q5 Hot Start High- Fidelity DNA Polymerase (NEB) using a set of  
106 primers targeting regions of the SARS-CoV-2 genome designed by ARTIC network  
107 (<https://artic.network/ncov-2019>). The PCR products were purified by adding equal  
108 volume of AMPure XP beads (Beckman Coulter). The sequencing was performed  
109 according to the eight-hour routine workflow and amplicons were repaired with  
110 NEBNext FFPE Repair Mix (NEB), followed by the DNA ends preparation using  
111 NEBNext End repair/ dA-tailing Module (NEB) before adding native barcodes and  
112 sequencing adapters supplied in the EXP-NBD104/114 kit (Nanopore) to the DNA  
113 ends. After priming the flow cell, 60 ng DNA per sample were pooled with a final  
114 volume of 65  $\mu$ L. Following the ligation sequencing kit (SQK-LSK109) protocol,  
115 MinION Mk1B was used to perform the genome sequencing on an R9.4.1 flow cell.

116

### 117 **Variant calling analysis**

118 A set of 40 SARS-CoV-2 genomes: 28 from Morocco, including six sequenced in the  
119 present study, 7 from Tunisia, 3 from Algeria, and 2 from Egypt, were downloaded  
120 from GISAID database (<http://www.gisaid.org/>) (14) (**Table 1**).

121 The reads generated by MinION Nanopore-Oxford of the six isolates were mapped to  
122 the reference sequence genome Wuhan-Hu-1/2019 using BWA-MEM v0.7.17-r1188  
123 (15) with default parameters, while the data downloaded from GISAID database was  
124 mapped using Minimap v2.12-r847 (16).

125 The BAM files were sorted using SAMtools (17) and were subsequently used to call the  
126 genetic variants in variant call format (VCF) by BCFtools (17). The final call set of the  
127 40 genomes, was annotated and their impact was predicted using SnpEff v 4.3t (18).  
128 First, the SnpEff databases were built locally using annotations of the reference genome  
129 NC\_045512.2 obtained in GFF format from NCBI database. Then, the SnpEff database  
130 was used to annotate SNPs and with putative functional effects according to the  
131 categories defined in the SnpEff manual

132 ([http://snpeff.sourceforge.net/SnpEff\\_manual.html](http://snpeff.sourceforge.net/SnpEff_manual.html)).

133

134 **Phylogenetic analysis and spatio-dynamic analysis**

135 We performed multiple sequence alignment using Muscle v 3.8 (19) for the 28  
136 Moroccan strains with 229 genomes of SARS-CoV-2 circulating in the world from  
137 different geographical areas (Africa, Asia, Europe, North and South America and  
138 Oceania) (**Table S2**). Maximum-likelihood trees were inferred with IQ-TREE v1.5.5  
139 under the GTR model (20). Generated trees were visualised using FigTree 1.4.3  
140 (<http://tree.bio.ed.ac.uk/software/figtree>).

## 141 **Results**

### 142 **Genetic variants in twenty-eight SARS-CoV-2 genomes from Morocco**

143 In order to identify the genetic variants of the SARS-COV-2 moroccan genomes, 28  
144 genomes were studied, including six sequenced in the present study and twenty-two  
145 others available in GISAID database (**Table 1**). 94.9 % to 99.93 % of the reads pro-  
146 duced for the six genomes were mapped on the reference sequence Wuhan-Hu-1/2019  
147 (**Table S1**). In all Moroccan SARS-CoV-2 genomes, the analysis of genetic variants re-  
148 vealed 61 mutations compared to the reference sequence (**Fig 1**), including 29 non-syn-  
149 onymous mutations, of them 27 (93.10%) having missense effects and 2 (6.90%) pro-  
150 ducing a lost stop, 27 synonymous mutations and 5 mutations localized in the intergenic  
151 regions. The distribution of these mutations along the viral genome revealed that five  
152 genes (ORF1ab, S, M, N and ORF3a) harbored mutations with varying frequencies. It is  
153 interesting to note that 37.7% (n = 23) of mutations were present in two or more  
154 genomes, while the remainder were singleton mutations. Focusing on non-synonymous  
155 mutations, 75.86% (n = 22) were located in the ORF1ab gene and distributed in eight  
156 non-structural proteins, including 6 (D1036E, L1249H, V2047F, P2110L, A2637V and  
157 T2648I) in nsp3-Multi- domain, 6 (C4588F, S4611L, C4772F, T5020I, A5039S and  
158 R5314M) in nsp12-RNA-dependent RNA polymerase (RdRp), three (P6000S, T6249P  
159 and M6345V) in nsp14-Exonuclease, 2 (T7083I and Ter6967Y) in nsp16 Methyltrans-  
160 ferase and one for each of the five other nsp; nsp2 (T265I), nsp5-main proteinase  
161 (V3388I), nsp10-CysHis (R4387S), nsp13-Helicase (T5448I) and nsp15-EndoRNase  
162 (Ter6668W). The remaining non-synonymous mutations (24.14%), were distributed in  
163 S (V6F, D614G, M1237I), N (R203K and D348H), M (L13F) and ORF3a (Q57H).

164

### 165 **Distribution of genetic variants in four North African countries**

166 In order to characterize the genetic variants of the circulating strains in North Africa, a  
167 set of 40 genomes, including 28 from Morocco, 7 from Tunisia, 3 from Algeria and 2  
168 from Egypt, were compared to the reference sequence Wuhan-Hu-1/2019. A total of  
169 118 mutations were detected, of them 58 non-synonymous mutations (91.38% have  
170 missense effects, 6.90% produce a lost stop and 1.72% produce a stop gained), 48 syn-

171 onymous mutations and 12 intergene mutations (**Fig 2A**). These mutations have been  
172 distributed in seven genes, (ORF1ab, S, E, M, N, ORF3a and ORF8) with variable fre-  
173 quencies. As regard to non-synonymous mutations (**Fig 2B**), we observed that four  
174 genes carried at least one non-synonymous mutation. ORF1ab harbored two-thirds of  
175 mutations (67.24%; n = 39), distributed in thirteen non-structural proteins; nsp3-Multi-  
176 domain: 17.24%, nsp12-RdRp: 12.07%, nsp4-transmembrane domain-2: 8.62%, nsp14-  
177 Exonuclease: 8.62%, nsp2: 3.45%, nsp13-Helicase: 3.45%, nsp16-Methyltransferase:  
178 3.45 %, nsp5-main proteinase: 1.72%, nsp6-transmembrane domain: 1.72%, nsp7:  
179 1.72%, nsp8: 1.72%, nsp10-CysHis: 1.72%, nsp15-EndoRNase: 1.72%. Followed by  
180 S, N and ORF3a proteins, with 12.07%, 10.34%, 5.17%, respectively. Whereas E, M  
181 and ORF8 proteins, having 1.72% of non-synonymous mutations each.

182 It is interesting to note that among the 58 non-synonymous mutations, 13 (22.41%)  
183 were recurrent in two or more genomes (**Fig 2A**). The most frequent one was the  
184 D614G mutation (in S protein) with a prevalence of 92.5% (n = 37) among the 40  
185 genomes included in this study, the second one was Q57H (in ORF3a) with a preva-  
186 lence of 42.5% (n = 17). These two mutations have been observed within the four north  
187 African countries (**Fig 2B**). However, the eleven other mutations were variable be-  
188 tween these four countries, for example, T265I (in nsp2) was found in 25% of the  
189 genomes, including those of Moroccan, Algerian and Tunisian origins. Likewise,  
190 T5020I mutation (in nsp12-RdRp) was found with a prevalence of 17.5% within  
191 genomes belonging to Morocco and Tunisia. In addition, K2798R mutation (in nsp4-  
192 transmembrane domain-2) was present in 10% of the genomes from Tunisia and Egypt.  
193 In addition, six mutations, R203K (in N protein), D1036E, V2047F, A2637V, T2648I  
194 (in nsp3-Multi-domain) and C4588F (in nsp12-RdRp) were recurrent in Moroccan  
195 genomes. Whereas, the two remaining mutations S202N (in N protein) as well as L84S  
196 (in ORF8) were recurrent in genomes of SARS-CoV-2 from Tunisia.

197

198 **Phylogenetic analysis of the SARS-CoV-2 Moroccan genomes with other genomes**  
199 **from different geographical areas**



200 The phylogenetic analysis was carried out using a set of 256 genomes from different  
201 countries representing the 6 continents (**Table S2**) in order to study the possible source  
202 of SARS-CoV-2 strains circulating in North Africa, with a focus on Moroccan strains.

203 The phylogenetic tree revealed five main clades: two clades (represented by mauve and  
204 green colors) particularly contained strains from Asia, while the other clades contained  
205 strains belonging to different continents. We observed that approximately 70% of the  
206 strains belonged to the clade colored in light orange and showing the mutation D614G  
207 (in S protein). With the exception of three strains from Tunisia, all of the North African  
208 strains harboring the D614G mutation belonged to this clade, which is also subdivided  
209 into several subclades. Among the twenty-eight Moroccan strains, five (Morocco/6893,  
210 Morocco/6906, Morocco/15N, Morocco/6902 and Morocco/6888) were close to the  
211 strains from South America (Chile or Brazil). Likewise, four strains (Morocco/RMPS-  
212 01, Morocco/RMPS-04, Morocco/RMPS-06 and Morocco/9601) seem to share a close  
213 sequence similarity with the strains from Israel (Asia), USA (North America) and the  
214 isolates from Algeria (Africa), while Morocco/RMPS-02 and Morocco/6891 were close  
215 to those from the USA (North America) and Tunisia (Africa). In addition, three strains  
216 (Morocco/6899 Morocco/6900 and Morocco/6905) were grouped with strains from  
217 Gambia (West Africa ), and Italy (Europe ) for Morocco/6906.

218 Remarkably, Moroccan and Tunisian strains were closely related to those from different  
219 continents, which could indicate different sources of infection with no single dominant  
220 strain circulating yet in Morocco.

221

## 222 **Discussion**

223 The appearance and monitoring of genetic variants plays a major role in orienting the  
224 therapeutic approach for the development of candidate vaccines in order to limit this  
225 SARS-CoV-2 pandemic (21). To date, the genetic diversity of SARS-CoV-2 strains  
226 from North Africa is poorly documented. In this study, we performed a genetic analysis  
227 of forty SARS-Cov-2 genomes from North Africa, including twenty-eight from  
228 Morocco (6 newly sequenced), seven from Tunisia, three from Algeria and two from  
229 Egypt, to provide new information on genetic diversity and transmission of SARS-  
230 CoV-2.

231 Genetic diversity could potentially increase the physical shape of the viral population  
232 and make it difficult to fight, or reverse, make the virus weaker, which could be  
233 correlated with the loss of their virulence and a decrease in the number of critical cases  
234 (22). Compared to the reference sequence of Wuhan-Hu-1/2019, strains from North  
235 Africa harbored 4 to 15 genetic variants, of which 1 to 11 are involved in the change of  
236 amino acids. These results are consistent with the mutation rate previously reported in  
237 SARS-CoV-2 from different geographic areas (13, 23-25).

238 In Morocco, Tunisia, Algeria and Egypt, five non-synonymous mutations were  
239 common within at least two countries. Among them, D614G (in S protein) and Q57H  
240 (in OR3a) were observed in strains from the four countries. The D614G mutation is  
241 proximal to the S1 cleavage domain of advanced glycoprotein (26) and was of great  
242 interest due to their predominance in the six continents (27, 28). Alouane et al. (13)  
243 showed that this mutation appeared for the first time on January 24, 2020 in the Asian  
244 region (China), after a week it was also observed in Europe (Germany). The Q57H  
245 mutation was taken away end of February in Africa (Senegal), Europe (France and  
246 Belgium) and North America (USA and Canada). Likewise, our previous study (13)  
247 showed that D614G had no impact on the two-dimensional or three-dimensional  
248 structure of advanced glycoprotein. Of the other three non-synonymous mutations that  
249 are variable between the strains from the four countries, T265I mutation (in nsp2) was  
250 identified Moroccan, Tunisian and Algerian strains, while K2798R (in nsp4-  
251 transmembrane domain-2) and T5020I mutations (in nsp12-RdRp) were observed  
252 within the strains from Tunisia-Egypt and Tunisia-Morocco, respectively. Among these

253 five mutations, four (D614G, Q57H, T265I and T5020I) have been considered as  
254 hotspot mutations in a large population (13, 23).

255 Focusing on SARS-CoV-2 Moroccan strains, four mutations were common within all  
256 strains, which is in agreement with recent studies showing a low frequency of recurrent  
257 mutations in thousands of SARS-CoV-2 genomes (13, 23).

258 The ORF1ab polyprotein is known to be cleaved into 16 non-structural proteins (nsp1-  
259 nsp16) (6). We observed two domains rich in non-synonymous mutations, the first,  
260 nsp3-Multi domain due to its large size compared to other non-structural proteins and  
261 previously described as playing a different role in SARS-CoV-2 infection (29).  
262 Likewise, nsp12-RdRp displays the same number of non-synonymous mutations  
263 although it has a smaller size and considered as a key element of the replication/  
264 transcription mechanism (30).

265 Phylogenetic analysis using a set of 256 strains representing the six continents revealed  
266 five main clades. The most important clade contained approximately three-quarters of  
267 all the strains. All SARS-CoV-2 strains from North Africa harboring the D614G  
268 mutation belonged to this clade, with the exception of three Tunisian strains. It is  
269 interesting to note that the Moroccan and Tunisian strains were closely related to those  
270 from Asia, Europe, South and North America, which could indicate different sources of  
271 SARS-CoV-2 infection in these two countries. Whereas, the sources of strains from  
272 Algeria and Egypt could probably be from two main countries namely Israel (Asia) and  
273 USA (North America).

274 These results provide valuable information on the genetic diversity of North African  
275 strains and their possible origins with a focus on the new Moroccan strains of SARS-  
276 CoV-2. This finding could lead to further comprehensive investigations combining  
277 genomic data, and clinical epidemiology of SARS-CoV -2 patients in North Africa.

278

279 **Conflict of interest**

280 The authors declare that they have no competing interests.

281 **Acknowledgments**

282 We sincerely thank the authors and laboratories around the world who have sequenced  
283 and shared the full genome data for SARS-CoV-2 in the GISAID database. All data  
284 authors can be contacted directly via [www.gisaid.org](http://www.gisaid.org).

285 This work was carried out under National Funding from the Moroccan Ministry of  
286 Higher Education and Scientific Research (Covid-19 Program) to AI. This work was  
287 also supported by a grant to AI from Institute of Cancer Research and the PPR-1 pro-  
288 gram to AI.

289

290 **References**

- 291 1. Zhu N, Zhang D, Wang W, Li X, Yang B, Song J, et al. A Novel Coronavirus from  
292 Patients 218 with Pneumonia in China, 2019. *N Engl J Med.* 382(8):727-33.
- 293 2. Kobias, F., & Gitaka, J. (2020). COVID-19: Are Africa's diagnostic challenges  
294 blunting response effectiveness?. *AAS Open Research*, 3:4.
- 295 3. Gilbert, M., Pullano, G., Pinotti, F., Valdano, E., Poletto, C., Boëlle, P. Y., ... &  
296 Gutierrez, B. (2020). Preparedness and vulnerability of African countries against  
297 importations of COVID-19: a modelling study. *The Lancet*, 395(10227), 871-877.
- 298 4. Cucinotta, D., & Vanelli, M. (2020). WHO declares COVID-19 a pandemic. *Acta*  
299 *bio-medica: Atenei Parmensis*, 91(1), 157-160.
- 300 5. WHO, "Coronavirus disease 2019 (COVID-19) Situation report," [https://](https://covid19.who.int/)  
301 [covid19.who.int/](https://covid19.who.int/) (accessed June 26, 2020 at 3:23pm).
- 302 6. Wu, A., Peng, Y., Huang, B., Ding, X., Wang, X., Niu, P., ... & Sheng, J. (2020).  
303 Genome composition and divergence of the novel coronavirus (2019-nCoV) origi-  
304 nating in China. *Cell host & microbe*.
- 305 7. Malik, Y. A. (2020). Properties of Coronavirus and SARS-CoV-2. *The Malaysian*  
306 *Journal of Pathology*, 42(1), 3-11.

- 307 8. Wang, N., Shang, J., Jiang, S., & Du, L. (2020). Subunit vaccines against emerging  
308 pathogenic human coronaviruses. *Frontiers in microbiology*, 11, 298.
- 309 9. Tai, W., He, L., Zhang, X., Pu, J., Voronin, D., Jiang, S., ... & Du, L. (2020). Char-  
310 acterization of the receptor-binding domain (RBD) of 2019 novel coronavirus: im-  
311 plication for development of RBD protein as a viral attachment inhibitor and vac-  
312 cine. *Cellular & molecular immunology*, 17(6), 613-620.
- 313 10. Chen, W. H., Strych, U., Hotez, P. J., & Bottazzi, M. E. (2020). The SARS-CoV-  
314 2 vaccine pipeline: an overview. *Current tropical medicine reports*, 1-4.
- 315 11. Domingo, E. (2000). Viruses at the edge of adaptation. *Virology*, 270(2), 251-  
316 253.
- 317 12. Domingo, E. J. J. H., & Holland, J. J. (1997). RNA virus mutations and fitness  
318 for survival. *Annual review of microbiology*, 51(1), 151-178.
- 319 13. Alouane, T., Laamarti, M., Essabbar, A., Hakmi, M., Bouricha, E. M., Chema-  
320 Elfihri, M. W., ... & Ghrifi, F. (2020). Genomic diversity and hotspot mutations in  
321 30,983 SARS-CoV-2 genomes: moving toward a universal vaccine for the "con-  
322 fined virus"? *bioRxiv*. DOI: 10.1101/2020.06.20.163188
- 323 14. Shu, Y., & McCauley, J. (2017). GISAID: Global initiative on sharing all in-  
324 fluenza data—from vision to reality. *Eurosurveillance*, 22(13), 30494.
- 325 15. Li, H., & Durbin, R. (2009). Fast and accurate short read alignment with Bur-  
326 rows–Wheeler transform. *bioinformatics*, 25(14), 1754-1760.
- 327 16. Li, H. (2018). Minimap2: pairwise alignment for nucleotide sequences. *Bioinfor-*  
328 *matics*, 34(18), 3094-3100.
- 329 17. Li, H., Handsaker, B., Wysoker, A., Fennell, T., Ruan, J., Homer, N., ... &  
330 Durbin, R. (2009). The sequence alignment/map format and SAMtools. *Bioinfor-*  
331 *matics*, 25(16), 2078-2079.
- 332 18. Cingolani, P., Platts, A., Wang, L. L., Coon, M., Nguyen, T., Wang, L., ... &  
333 Ruden, D. M. (2012). A program for annotating and predicting the effects of single  
334 nucleotide polymorphisms, SnpEff: SNPs in the genome of *Drosophila*  
335 *melanogaster* strain w1118; iso-2; iso-3. *Fly*, 6(2), 80-92.

- 336 19. Edgar, R. C. (2004). MUSCLE: multiple sequence alignment with high accuracy  
337 and high throughput. *Nucleic acids research*, 32(5), 1792-1797.
- 338 20. Nguyen, L. T., Schmidt, H. A., Von Haeseler, A., & Minh, B. Q. (2015). IQ-  
339 TREE: a fast and effective stochastic algorithm for estimating maximum-likeli-  
340 hood phylogenies. *Molecular biology and evolution*, 32(1), 268-274.
- 341 21. Tu, Y. F., Chien, C. S., Yarmishyn, A. A., Lin, Y. Y., Luo, Y. H., Lin, Y. T., ... &  
342 Wang, M. L. (2020). A review of SARS-CoV-2 and the ongoing clinical trials. In-  
343 ternational journal of molecular sciences, 21(7), 2657.
- 344 22. Parrish, C. R., Holmes, E. C., Morens, D. M., Park, E. C., Burke, D. S., Calisher,  
345 C. H., ... & Daszak, P. (2008). Cross-species virus transmission and the emergence  
346 of new epidemic diseases. *Microbiology and Molecular Biology Reviews*, 72(3),  
347 457-470.
- 348 23. Laamarti, M., Alouane, T., Kartti, S., Chemaou-Elfihri, M. W., Hakmi, M., Essab-  
349 bar, A., ... & El Jaoudi, R. (2020). Large scale genomic analysis of 3067 SARS-  
350 CoV-2 genomes reveals a clonal geodistribution and a rich genetic variations of  
351 hotspots mutations. bioRxiv. DOI: 10.1101/2020.05.03.074567
- 352 24. Hassan, S.S.; Pal Choudhury, P.; Roy, B. SARS-CoV2 Envelope Protein: Non-  
353 Synonymous Mutations and Its Consequences. Preprints 2020, 2020060072 (doi:  
354 10.20944/preprints202006.0072.v1).
- 355 25. Yu, W. B., Tang, G. D., Zhang, L., & Corlett, R. T. (2020). Decoding the evolu-  
356 tion and transmissions of the novel pneumonia coronavirus (SARS-CoV-2/HCoV-  
357 19) using whole genomic data. *Zoological Research*, 41(3), 247.
- 358 26. Veljkovic, V., Perovic, V., & Paessler, S. (2020). Prediction of the effectiveness  
359 of COVID-19 vaccine candidates. *F1000Research*, 9(365), 365.
- 360 27. Eaaswarkhanth, M., Al Madhoun, A., & Al-Mulla, F. (2020). Could the D614 G  
361 substitution in the SARS-CoV-2 spike (S) protein be associated with higher  
362 COVID-19 mortality?. *International Journal of Infectious Diseases*.
- 363 28. Kiyotani, K., Toyoshima, Y., Nemoto, K., & Nakamura, Y. (2020). Bioinformatic  
364 prediction of potential T cell epitopes for SARS-Cov-2. *Journal of Human Genet-  
365 ics*, 65(7), 569-575.

- 366 29. Angeletti, S., Benvenuto, D., Bianchi, M., Giovanetti, M., Pascarella, S., & Cic-  
367 cozzi, M. (2020). COVID 2019: the role of the nsp2 and nsp3 in its pathogenesis.  
368 *Journal of medical virology*, 92(6), 584-588.
- 369 30. Pachetti M, Marini B, Benedetti F, Giudici F, Mauro E, Storici P, et al. Emerging  
370 SARS-CoV-2 Mutation Hot Spots Include a Novel RNA-dependent-RNA Poly-  
371 merase Variant. *J Transl Med.* 2020;18: 179.
- 372

373 **Table and Figures**

374 **Table I: Full genomes of SARS-CoV-2 from North Africa used in this study.**

| Virus name         | Accession ID   | Collection date | Originatinglab                 | Platform              |
|--------------------|----------------|-----------------|--------------------------------|-----------------------|
| Morocco/RMPS-01    | EPI_ISL_469017 | 2020-04-13      | MedBiotech (Morocco)           | MinIONNanopore-Oxford |
| Morocco/RMPS-02    | EPI_ISL_469049 | 2020-03-30      |                                |                       |
| Morocco/RMPS-03    | EPI_ISL_469051 | 2020-04-03      |                                |                       |
| Morocco/RMPS-04    | EPI_ISL_469052 | 2020-03-30      |                                |                       |
| Morocco/RMPS-05    | EPI_ISL_469053 | 2020-03-30      |                                |                       |
| Morocco/RMPS-06    | EPI_ISL_469054 | 2020-04-01      |                                |                       |
| Morocco/6887       | EPI_ISL_459965 | 2020-03-03      | Pasteur Institute (Morocco)    | Illumina-NextSEQ500   |
| Morocco/6888       | EPI_ISL_459966 | 2020-03-15      |                                |                       |
| Morocco/6889       | EPI_ISL_459967 | 2020-03-15      |                                |                       |
| Morocco/6890       | EPI_ISL_459968 | 2020-03-17      |                                |                       |
| Morocco/6891       | EPI_ISL_459969 | 2020-03-20      |                                |                       |
| Morocco/6892       | EPI_ISL_459970 | 2020-03-17      |                                |                       |
| Morocco/6893       | EPI_ISL_459971 | 2020-03-18      |                                |                       |
| Morocco/6894       | EPI_ISL_459972 | 2020-03-20      |                                |                       |
| Morocco/6895       | EPI_ISL_459973 | 2020-03-20      |                                |                       |
| Morocco/6896       | EPI_ISL_459974 | 2020-03-20      |                                |                       |
| Morocco/6897       | EPI_ISL_459975 | 2020-03-21      |                                |                       |
| Morocco/6898       | EPI_ISL_459976 | 2020-03-16      |                                |                       |
| Morocco/6899       | EPI_ISL_459977 | 2020-04-21      |                                |                       |
| Morocco/6900       | EPI_ISL_459978 | 2020-04-20      |                                |                       |
| Morocco/6901       | EPI_ISL_459979 | 2020-04-19      |                                |                       |
| Morocco/6902       | EPI_ISL_459980 | 2020-04-19      |                                |                       |
| Morocco/6903       | EPI_ISL_459981 | 2020-04-19      |                                |                       |
| Morocco/6904       | EPI_ISL_459982 | 2020-04-18      |                                |                       |
| Morocco/6905       | EPI_ISL_459983 | 2020-04-21      |                                |                       |
| Morocco/6906       | EPI_ISL_459984 | 2020-04-06      |                                |                       |
| Morocco/OUA677-19  | EPI_ISL_451400 | 2020-04-23      | LRAM (Morocco)                 | Illumina-MiSeq        |
| Morocco/15N        | EPI_ISL_458150 | 2020-05-15      | ANOUAL laboratory (Morocco)    | AppliedBiosystems PGM |
| Tunisia/MHT_2      | EPI_ISL_458286 | 2020-03-24      | IMB, (Germany/ Submitting lab) | NanoporeGridION       |
| Tunisia/COV0010-12 | EPI_ISL_463001 | 2020-03-18      | Institut Pasteur (Tunisia)     | Illumina              |
| Tunisia/COV0880    | EPI_ISL_463002 | 2020-03-28      |                                |                       |
| Tunisia/COV1339    | EPI_ISL_463003 | 2020-03-30      |                                |                       |



|                    |                |            |                             |                     |
|--------------------|----------------|------------|-----------------------------|---------------------|
| Tunisia/COV1663    | EPI_ISL_463004 | 2020-04-01 |                             |                     |
| Tunisia/COV0425    | EPI_ISL_463005 | 2020-03-27 |                             |                     |
| Tunisia/COV1482    | EPI_ISL_463006 | 2020-03-31 |                             |                     |
| Algeria/G0638_2264 | EPI_ISL_418241 | 2020-03-02 | Pasteur Institute (Algeria) | Illumina-NextSEQ500 |
| Algeria/G0640_2265 | EPI_ISL_418242 | 2020-03-08 |                             |                     |
| Algeria/G0860_2262 | EPI_ISL_420037 | 2020-03-02 |                             |                     |
| Egypt/NRC-03       | EPI_ISL_430819 | 2020-03-18 | CSEIV-NRC (Egypt)           | Illumina-MiSeq      |
| Egypt/NRC-01       | EPI_ISL_430820 | 2020-03-18 |                             |                     |

375

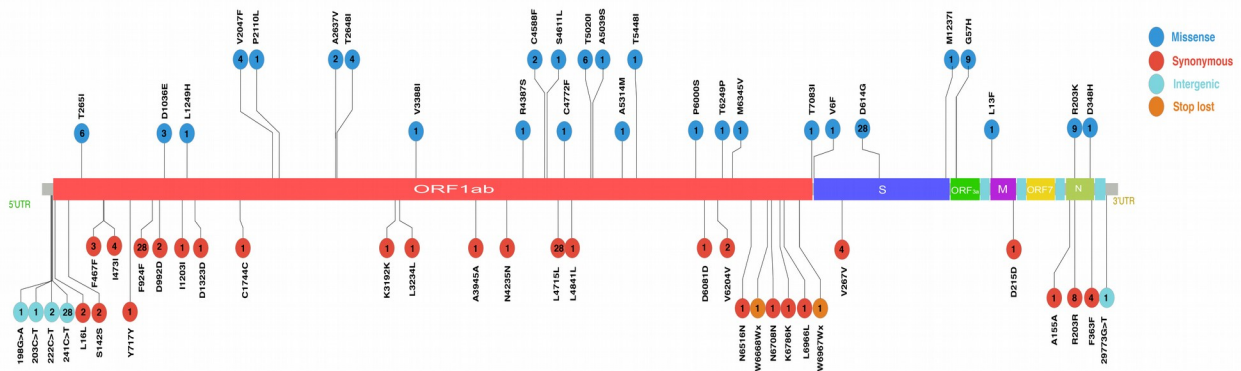

376 **Figure 1: SARS-CoV-2 genomes landscape illustration representing mutations**  
 377 **identified in 28 Moroccan genomes.** Colored circles represent gene distribution across  
 378 the genomes. Lollipop stick represents individual mutation. Colored circles represent  
 379 the type of mutation and the blue box; this represents the number of genomes harboring the  
 380 mutations.

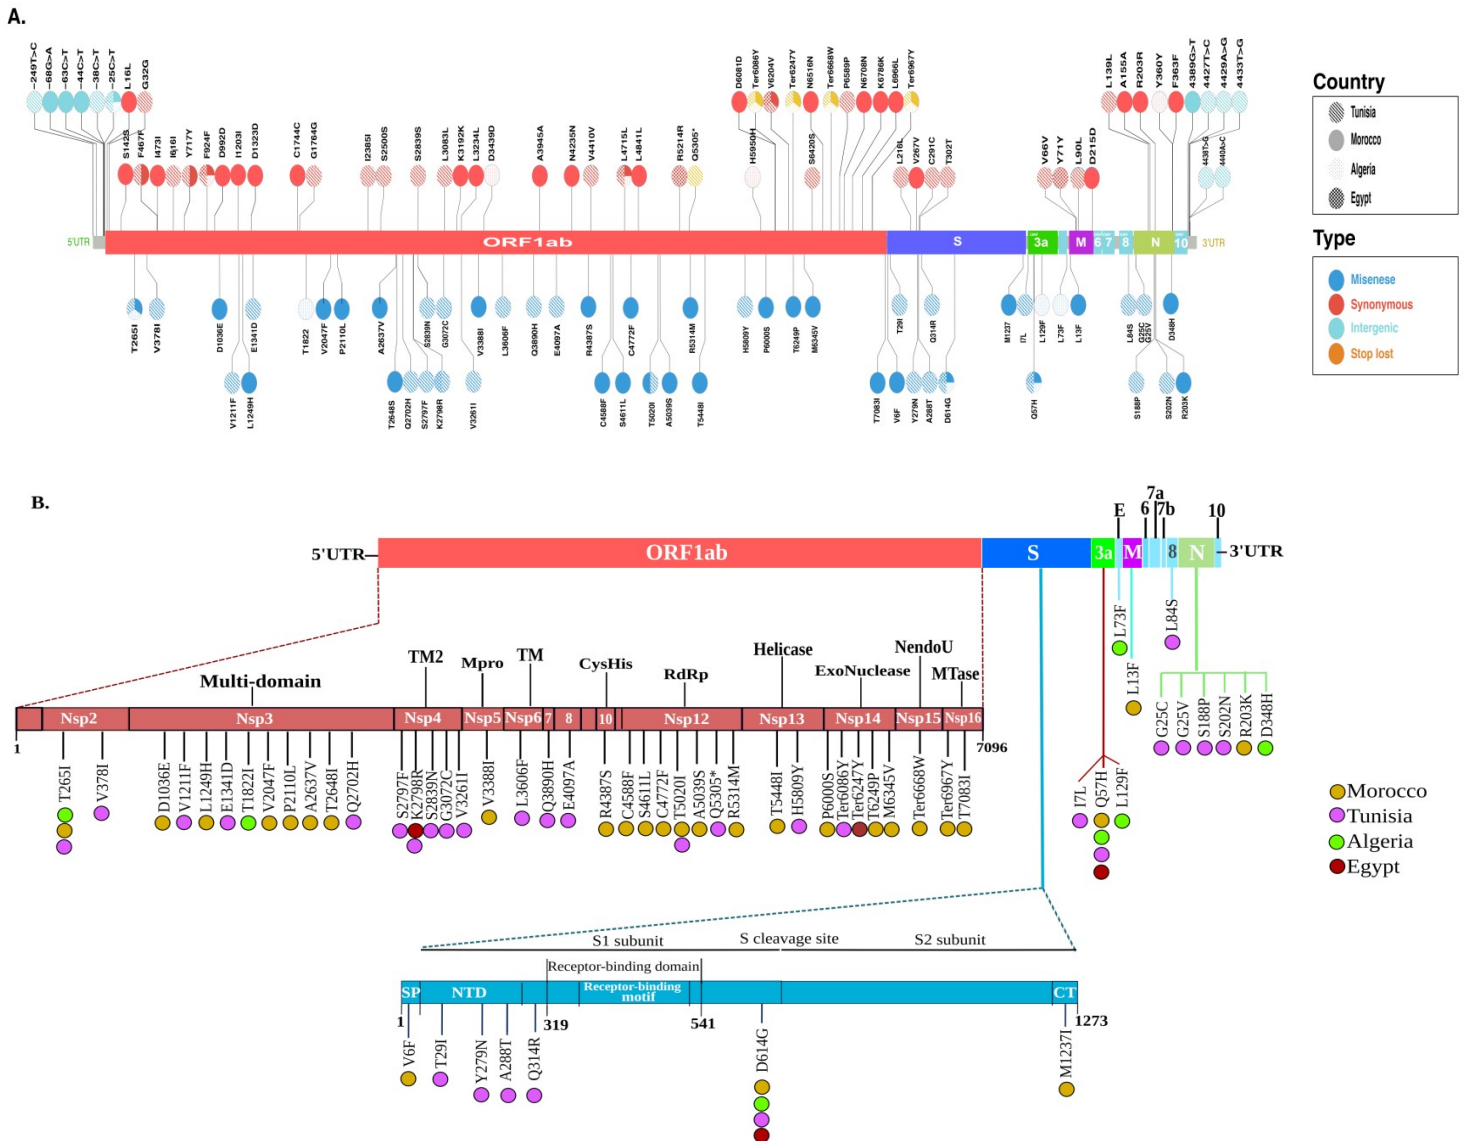

381 **Figure 2: SARS-CoV-2 genomes landscape illustration representing mutations**  
 382 **identified in North African genomes. (A)** Distribution of all types of mutations  
 383 (Nonsynonymous, synonymous and intergenic) identified in the genomes of North  
 384 Africa (Algeria, Egypt, Tunisia and Morocco). The lollipop stick represents individual  
 385 mutations. The colored circles represent the type of mutation across the genomes. The  
 386 fill pattern corresponds to each country, as indicated in the key box. **(B)** Distribution of  
 387 non-synonymous mutations along the viral genome. Vertical lines: 58 non-synonymous  
 388 mutations. Colored circles: the different countries assessed.

389

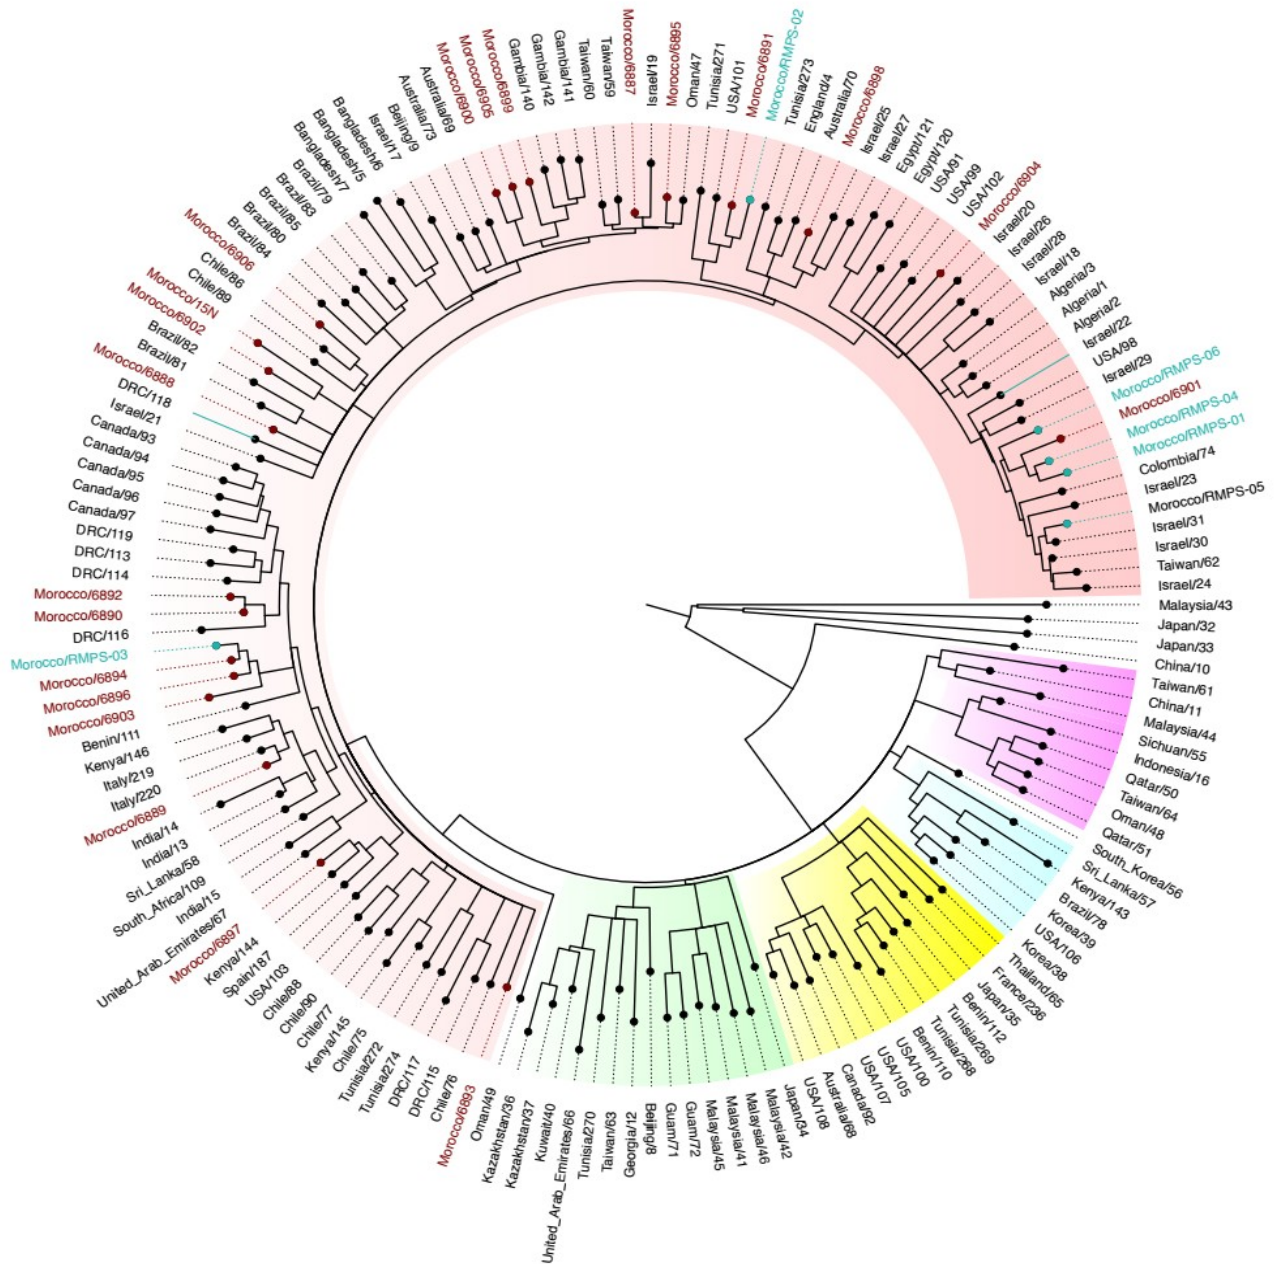

390 **Figure 3: Phylogenetic tree based on 256 complete SARS-COV2 genomes from dif-**  
391 **ferent geographic areas.** The scale bar shows the length of the branch which repre-  
392 sents the change of nucleotides in the genome. The six Moroccan isolates newly se-  
393 quenced in this study, are represented by turquoise and the other genomes from the  
394 same country (retrieved from the GISAID database), represented by red.
